# Supplementary material
Source: PubMed Central journal article supplement (PMC4793650)
Supplement: dorc018443.w1_default.pdf [file dorc018443.w1_default.pdf]

## **Appendix**

Diagnostic and procedure codes used to determine proven occlusive vascular disease in a hospital admission: MI - International Classification of Diseases, Version 9 (ICD-9) codes 410.x or ICD-10 I21.x; stroke - ICD-9 codes 433.x, 434.x, 431, 436 or ICD-10 codes I63.x, I65.x, I66.3, I61.x, I64; CABG - Canadian Classification of Health Interventions (CCI) codes 1IJ57LA.x, 1IJ57VS.x, 1IJ76.x or Canadian Classification of Diagnostic, Therapeutic and Surgical Procedures (CCP) codes 48.1, 48.11, 48.12, 48.13, 48.14, 48.15, 48.16, 48.17, 48.19; PCTA - CCI codes , 1IJ50.x, 1IJ57G.x or CCP codes 48.02 or 48.03.
